# Supplementary material
Source: Springer Nature journal article supplement (https://www.springermedizin.de/resource/supplementary/12990_2011_434_MOESM3_ESM.pdf/9613258)

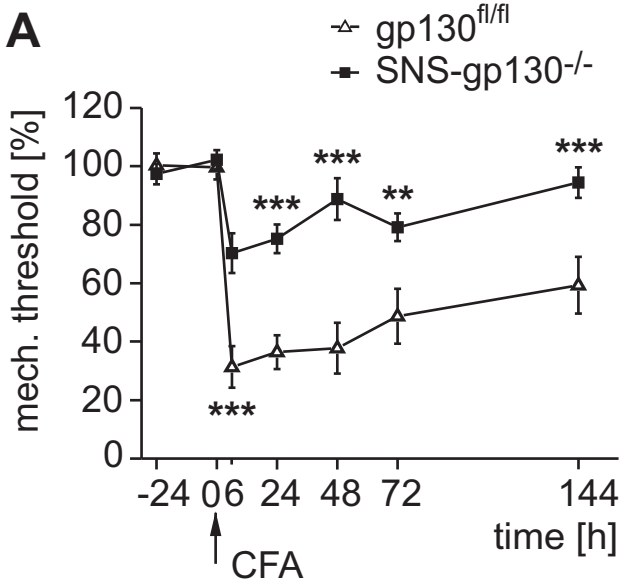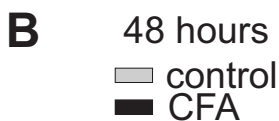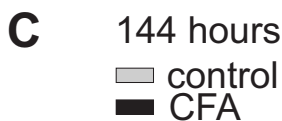

gp130<sup>fl/fl</sup>

SNS-gp130<sup>-/-</sup>

gp130<sup>fl/fl</sup>

SNS-gp130<sup>-/-</sup>

Supplement: MOESM3 [file 9613258]
